# Supplementary material for: Effect of electron-acceptor strength of zeolite on the luminescence decay rate of Ru(bpy)32+ incorporated within zeolites
Source: Royal Society of Chemistry journal article supplement (doi:10.1039/b605469b), 2006-07-06
Supplement: b605469b.pdf [file b605469b.pdf]

Figure S1

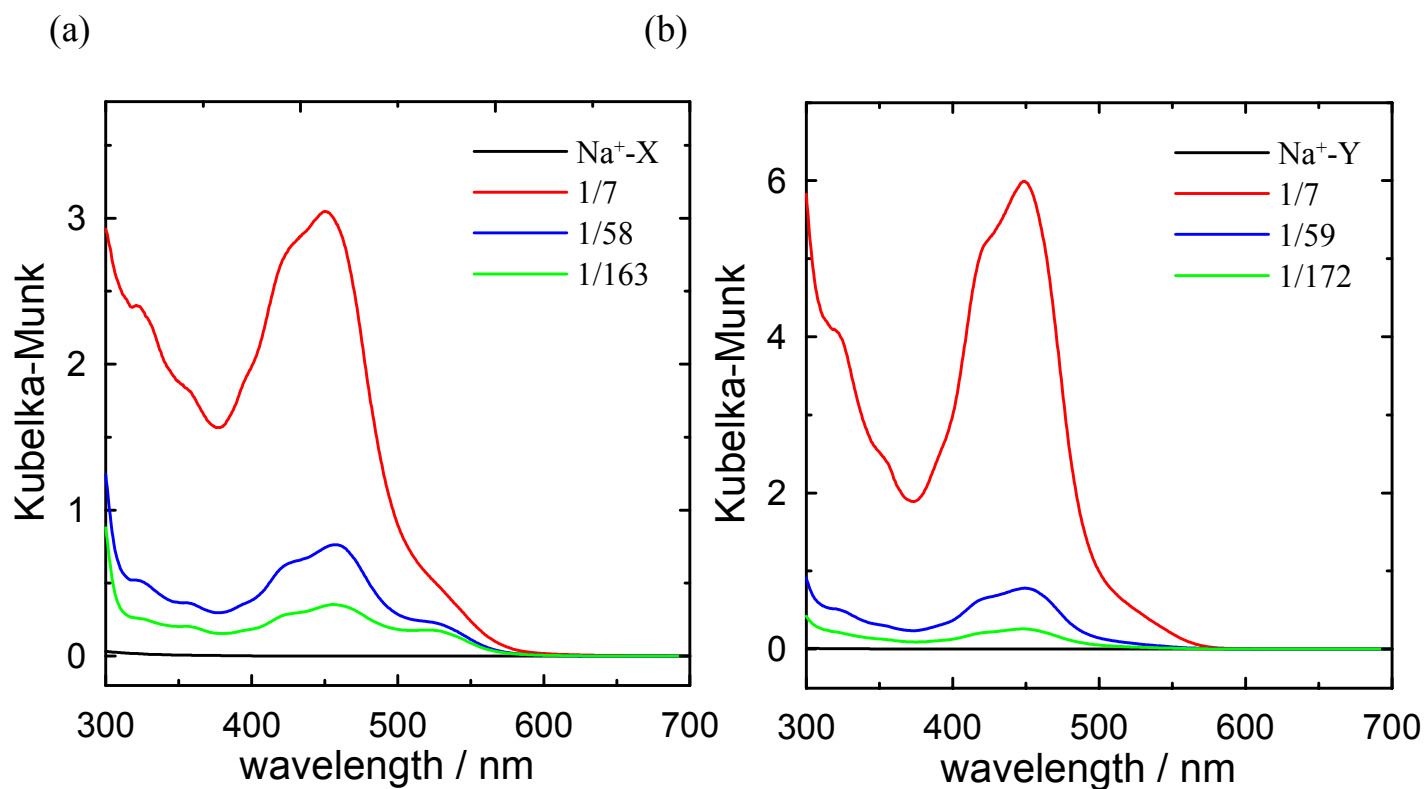

Figure S1 Diffuse reflectance absorption spectra of the MLCT region of Ru(bpy)<sub>3</sub><sup>2+</sup> in dehydrated zeolites: (a) Na<sup>+</sup>-X and (b) Na<sup>+</sup>-Y at three loading levels.

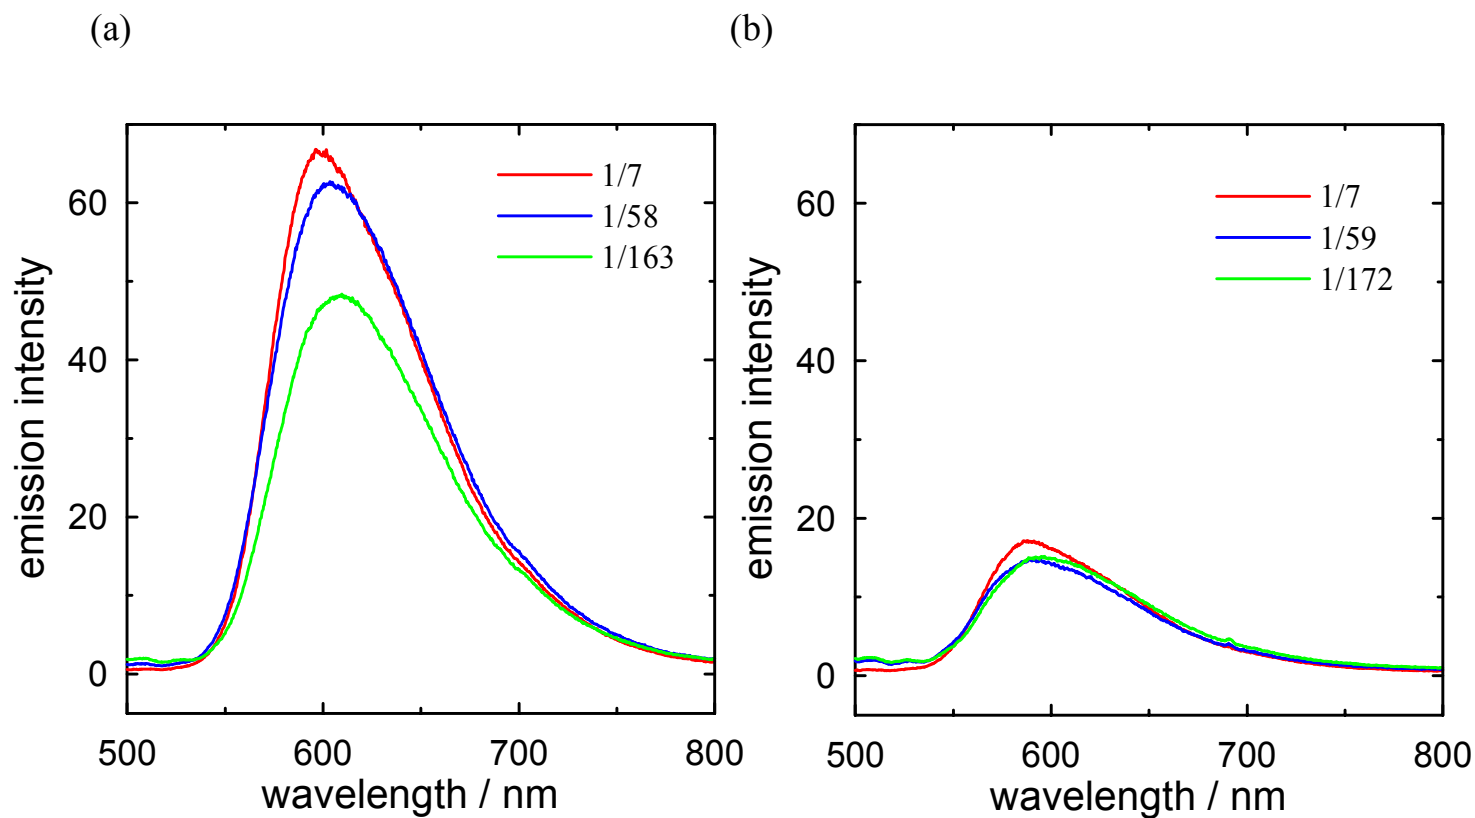

Figure S2 Luminescence spectra of Ru(bpy)<sub>3</sub><sup>2+</sup> in dehydrated zeolite excited at 460 nm for Na<sup>+</sup>-X (a) and for Na<sup>+</sup>-Y (b), both at three loading levels.

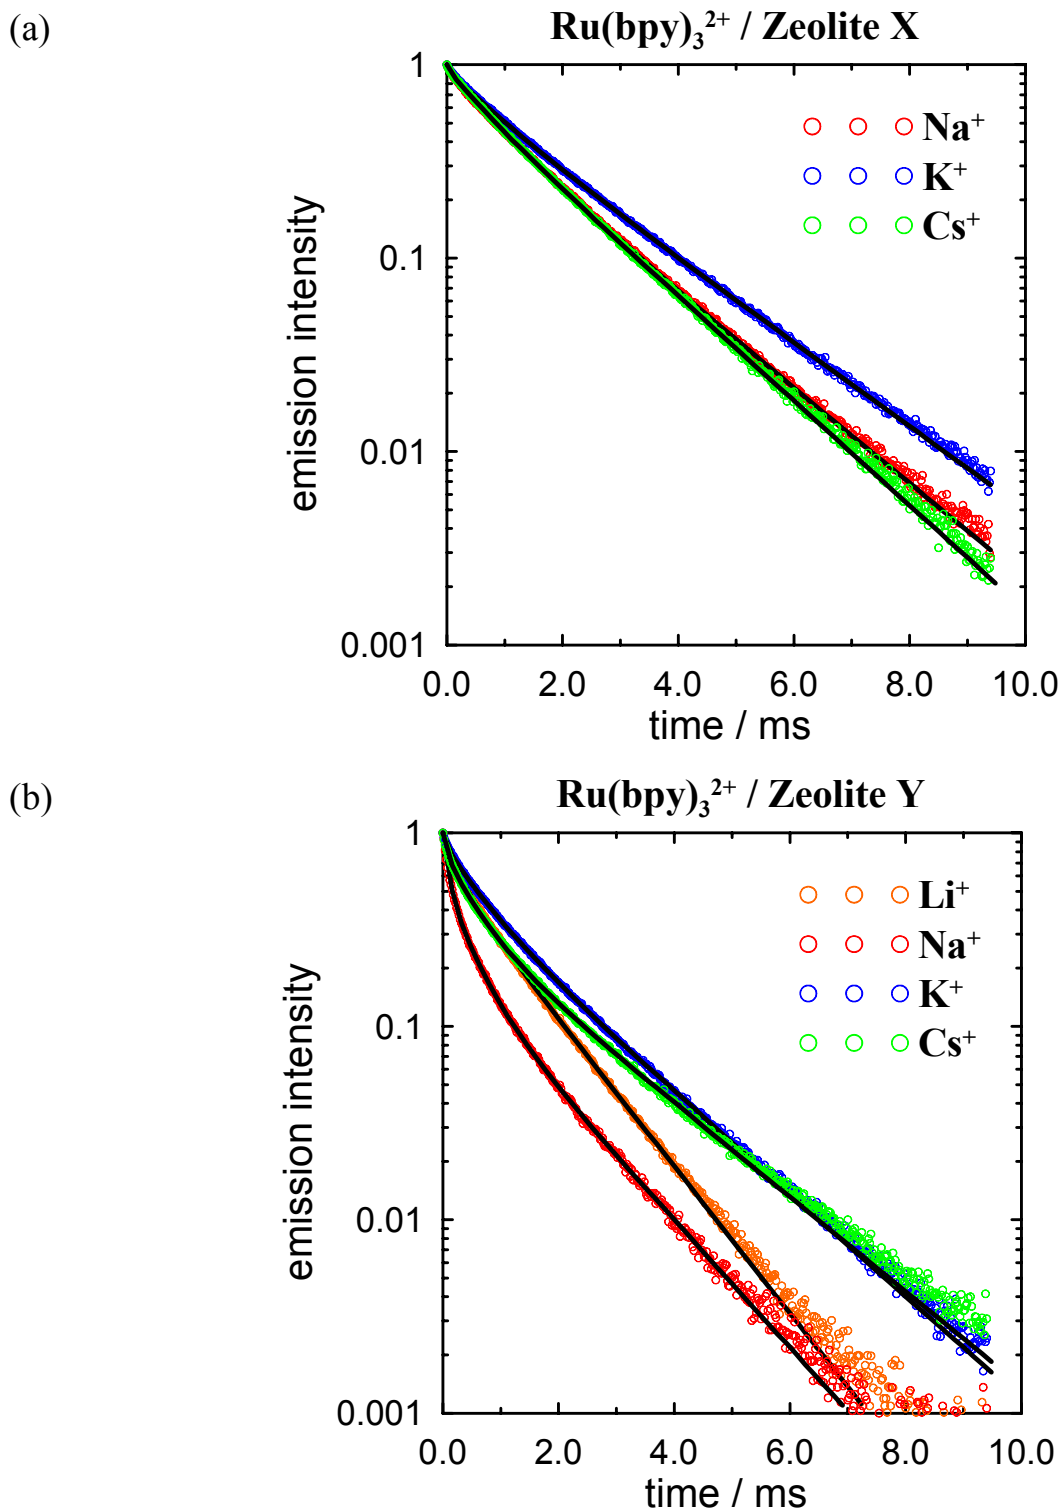

Figure S3

Luminescence

decay curves of Ru(bpy)<sub>3</sub><sup>2+</sup> in dehydrated alkali metal cation-exchanged zeolites excited at 460 nm (0.50 μJ cm<sup>-2</sup>) and measured at 610 nm: (a) M<sup>+</sup>-X ( $\bar{n} = 1/58$ ) and (b) M<sup>+</sup>-Y ( $\bar{n} = 1/59$ ). Solid curves show the sum of three exponential fitting.
